# Supplementary material for: Association of Framingham Steatosis Index with the risk of all-cause, cardiovascular and cancer mortality: A prospective cohort study from NHANES
Source: Research Square preprint supplement (doi:10.21203/rs.3.rs-8626301/v1), 2026-01-21
Supplement: Supplementary file 1 [file 44aa1ce6d406f5ee5e078f5d.docx]

| **Table S2 Association of FSI with the risk of all cause, cardiovascular and cancer mortality** | | | | | | |
| --- | --- | --- | --- | --- | --- | --- |
|
|  |  | Event N(%) | Unadjusted | | Adjusted | |
| HR(95% CI) | *P* value | HR(95% CI) | *P* value |
| **All cause mortality** | Q1 | 169 (4.6) | 1.00(Ref.) |  | 1.00(Ref.) |  |
| Q2 | 406 (11.1) | 2.52 (2.11~3.02) | <0.001 | 2.36 (1.96~2.83) | <0.001 |
| Q3 | 560 (15.2) | 3.54 (2.98~4.21) | <0.001 | 2.94 (2.45~3.53) | <0.001 |
| Q4 | 557 (15) | 3.51 (2.95~4.16) | <0.001 | 2.4 (1.98~2.91) | <0.001 |
| **CVD mortality** | Q1 | 25 (0.7) | 1.00(Ref.) |  | 1.00(Ref.) |  |
| Q2 | 85 (2.3) | 3.58 (2.29~5.6) | <0.001 | 3.4 (2.17~5.34) | <0.001 |
| Q3 | 155 (4.2) | 6.67 (4.37~10.17) | <0.001 | 5.43 (3.51~8.41) | <0.001 |
| Q4 | 161 (4.3) | 6.88 (4.52~10.49) | <0.001 | 4.68 (2.97~7.37) | <0.001 |
| **Cancer mortality** | Q1 | 49 (1.3) | 1.00(Ref.) |  | 1.00(Ref.) |  |
| Q2 | 91 (2.5) | 1.94 (1.37~2.74) | <0.001 | 1.85 (1.3~2.64) | 0.001 |
| Q3 | 121 (3.3) | 2.62 (1.88~3.66) | <0.001 | 2.39 (1.68~3.4) | <0.001 |
| Q4 | 128 (3.5) | 2.76 (1.99~3.84) | <0.001 | 2.19 (1.51~3.18) | <0.001 |
| Q, quartile; HR:hazard ratio; CI: confidence interval; PIR: poverty-income ratio; LDL:low-density lipoprotein; HDL:high-density lipoprotein; Cr:creatinine; HF: heart failure; CHD:coronary heart disease | | | | | | |
| Adjust for race, education, PIR, marry status, smoking, alcohol consumption, glucose, LDL, HDL, Cr, HF, CHD, Stroke. | | | | | | |
