# Supplementary material for: Association of Framingham Steatosis Index with the risk of all-cause, cardiovascular and cancer mortality: A prospective cohort study from NHANES
Source: Research Square preprint supplement (doi:10.21203/rs.3.rs-8626301/v1), 2026-01-21
Supplement: Supplementary file 2 [file 5d6625be379d5b7489398e5c.docx]

| **Table S1 Association of FSI with the risk of all cause, cardiovascular and cancer mortality** | | | | | | |
| --- | --- | --- | --- | --- | --- | --- |
|
|  |  | Event N(%) | Unadjusted | | Adjusted | |
| HR(95% CI) | *P* value | HR(95% CI) | *P* value |
| **All cause mortality** | Q1 | 172 (4.6) | 1.00(Ref.) |  | 1.00(Ref.) |  |
| Q2 | 404 (10.9) | 2.44 (2.05~2.92) | <0.001 | 2.28 (1.9~2.73) | <0.001 |
| Q3 | 557 (15) | 3.47 (2.92~4.12) | <0.001 | 2.87 (2.4~3.43) | <0.001 |
| Q4 | 556 (15) | 3.48 (2.93~4.12) | <0.001 | 2.33 (1.92~2.82) | <0.001 |
| **CVD mortality** | Q1 | 25 (0.7) | 1.00(Ref.) |  | 1.00(Ref.) |  |
| Q2 | 85 (2.3) | 3.55 (2.27~5.55) | <0.001 | 3.35 (2.13~5.25) | <0.001 |
| Q3 | 154 (4.1) | 6.63 (4.35~10.12) | <0.001 | 5.36 (3.46~8.3) | <0.001 |
| Q4 | 162 (4.4) | 7 (4.59~10.66) | <0.001 | 4.59 (2.92~7.22) | <0.001 |
| **Cancer mortality** | Q1 | 50 (1.3) | 1.00(Ref.) |  | 1.00(Ref.) |  |
| Q2 | 91 (2.5) | 1.89 (1.34~2.67) | <0.001 | 1.8 (1.26~2.55) | 0.001 |
| Q3 | 121 (3.3) | 2.58 (1.86~3.59) | <0.001 | 2.32 (1.64~3.29) | <0.001 |
| Q4 | 128 (3.4) | 2.74 (1.97~3.8) | <0.001 | 2.1 (1.45~3.04) | <0.001 |
| Q, quartile; HR:hazard ratio; CI: confidence interval; PIR: poverty-income ratio; LDL:low-density lipoprotein; HDL:high-density lipoprotein; Cr:creatinine; HF: heart failure; CHD:coronary heart disease | | | | | | |
| Adjust for race, education, PIR, marry status, smoking, alcohol consumption, glucose, LDL, HDL, Cr, HF, CHD, Stroke. | | | | | | |
